# Supplementary material
Source: Springer Nature journal article supplement (https://www.springermedizin.de/resource/supplementary/12916_2013_917_MOESM1_ESM.pdf/9598818)
Supplement: MOESM1 [file 9598818]

|                                                                                          |                                    | <b>Breast cancer</b>                                                                               | <b>Colorectal cancer</b>                                                                    | <b>Prostate cancer</b>                                                                      |
|------------------------------------------------------------------------------------------|------------------------------------|----------------------------------------------------------------------------------------------------|---------------------------------------------------------------------------------------------|---------------------------------------------------------------------------------------------|
| Patients diagnosed 1998-2007 with CPRD coverage and no previous cancer.                  |                                    | 11,863 breast cancer patients                                                                      | 7,081 colorectal cancer patients                                                            | 8,128 prostate cancer patients                                                              |
|                                                                                          |                                    | ⇩                                                                                                  | ⇩                                                                                           | ⇩                                                                                           |
| After excluding patients where cancer diagnosis preceded CPRD research quality records.* |                                    | 10,969 breast cancer patients                                                                      | 6,666 colorectal cancer patients                                                            | 7,495 prostate cancer patients                                                              |
|                                                                                          |                                    | ⇩                                                                                                  | ⇩                                                                                           | ⇩                                                                                           |
| After excluding patients where death registration data unavailable.†                     |                                    | 10,853 breast cancer patients                                                                      | 6,540 colorectal cancer patients                                                            | 7,388 prostate cancer patients                                                              |
|                                                                                          |                                    | ⇩                                                                                                  | ⇩                                                                                           | ⇩                                                                                           |
| After excluding patients with <1 year follow-up.                                         |                                    | 9,971 breast cancer patients                                                                       | 4,762 colorectal cancer patients                                                            | 6,513 prostate cancer patients                                                              |
|                                                                                          |                                    | ⇩                                                                                                  | ⇩                                                                                           | ⇩                                                                                           |
| After excluding patients where hormone therapy preceded cancer diagnosis by 8 weeks.‡    |                                    | 9,814 breast cancer patients                                                                       | 4,762 colorectal cancer patients                                                            | 6,339 prostate cancer patients                                                              |
|                                                                                          |                                    | ⇩                                                                                                  | ⇩                                                                                           | ⇩                                                                                           |
| Final cohort for analysis.                                                               |                                    | 9,814 breast cancer patients<br>1,440 cancer specific deaths<br>2,271 all-cause deaths             | 4,762 colorectal cancer patients<br>1,528 cancer specific deaths<br>2,134 all-cause deaths  | 6,339 prostate cancer patients<br>1,194 cancer specific deaths<br>2,213 all-cause deaths    |
|                                                                                          |                                    | ⇩                                                                                                  | ⇩                                                                                           | ⇩                                                                                           |
| Data for analysis after conversion to case-control data.                                 | Cancer-specific mortality analysis | 1,435 cancer-specific deaths (cases)<br>7,106 matched controls<br>(5 cases had no available match) | 1,511 cancer-specific deaths<br>7,291 matched controls<br>(17 cases had no available match) | 1,184 cancer-specific deaths<br>5,849 matched controls<br>(10 cases had no available match) |
|                                                                                          | All-cause mortality analysis       | 2,258 all-cause deaths<br>11,154 matched controls<br>(13 cases had no available match)             | 2,101 all-cause deaths<br>10,107 matched controls<br>(33 cases had no available match)      | 2,197 all-cause deaths<br>10,838 matched controls<br>(16 cases no available match)          |

\* Patients excluded because cancer diagnosis preceded CPRD research quality records, and therefore prescription records may not be complete from diagnosis.

† Patients excluded because death registration data unavailable and therefore death and cause of death data would not be identified in this patients.

‡ Patients excluded because hormone therapy records preceding cancer diagnosis suggests an incorrect diagnosis date, not applicable to colorectal cancer.
